# Supplementary material for: Direct fishing and eDNA metabarcoding for biomonitoring during a 3-year survey significantly improves number of fish detected around a South East Asian reservoir
Source: PubMed Central journal article supplement (PMC6292600; doi:10.1371/journal.pone.0208592), 2018-12-13
Supplement: pone.0208592.s002.pdf [file pone.0208592.s002.pdf]

**S1 Table: Names of the sampling locations and geographic coordinates (modified from [33])**

| Water body            | Sampling sites | Description location                                                          | Possible effect of the dam/reservoir                                                                      | Latitude   | Longitude   |
|-----------------------|----------------|-------------------------------------------------------------------------------|-----------------------------------------------------------------------------------------------------------|------------|-------------|
| Nam Theun River       | NTH1           | Nam Theun river upstream Nam Noy confluence                                   | Reference station, not impacted by the reservoir. Upstream of the reservoir backwaters                    | 17.8194359 | 105.3470586 |
|                       | NTH2           | Nam Theun river upstream reservoir, downstream Nam Theun / Nam Noy confluence | Reference station, almost not impacted by the reservoir. Seasonally under the influence of the Reservoir. | 17.7381281 | 105.3228492 |
|                       | NTH6           | Nam Theun 10 km upstream Nam Theun bridge                                     | Impacted, located after the dam                                                                           | 18.1859092 | 104.7157990 |
| Nam Theun 2 Reservoir | RES4           | Reservoir at Ban Thalang                                                      | Middle of the reservoir. Narrow waterway. Transition between east and west part of reservoir              | 17.8509318 | 105.0457535 |
| Xe Bangfai River      | XBF0           | Upstream confluence of the Downstream Channel                                 | Reference stations upstream of the downstream channel et outside of the backwaters.                       | 17.4688875 | 105.5074783 |
|                       | XBF1           |                                                                               |                                                                                                           | 17.5000469 | 105.4257345 |
|                       | XBF2           | Mahaxai, downstream confluence with the Downstream Channel                    | Receiving the turbinated waters from the Downstream Channel.                                              | 17.4250942 | 105.2030290 |
|                       | XBF3           |                                                                               |                                                                                                           | 17.3377207 | 105.1522599 |
