# Supplementary material for: Direct fishing and eDNA metabarcoding for biomonitoring during a 3-year survey significantly improves number of fish detected around a South East Asian reservoir
Source: PubMed Central journal article supplement (PMC6292600; doi:10.1371/journal.pone.0208592), 2018-12-13
Supplement: pone.0208592.s004.pdf [file pone.0208592.s004.pdf]

**S3 Table. Taxonomic repartition of 12S and *cytb* reads obtained for all filters (all sites and all sampling campaigns).**

|                              | Taxonomic group   | Order  | Family  | Genus    | Species   | Reads   | %reads |
|------------------------------|-------------------|--------|---------|----------|-----------|---------|--------|
| <b>12S (97%ID)</b>           | <i>Fish</i>       | 9 (+1) | 22 (+4) | 68 (+12) | 82 (+34)  | 6654996 | 95.68  |
|                              | <i>Amphibians</i> | 1      | 6       | 7        | 2 (+5)    | 56139   | 0.81   |
|                              | <i>Mammals</i>    | 4 (+1) | 13 (+1) | 20 (+4)  | 15 (+12)  | 221119  | 3.18   |
|                              | <i>Birds</i>      | 4      | 5       | 6 (+2)   | 6 (+2)    | 23560   | 0.34   |
|                              | <i>Reptiles</i>   | -      | -       | -        | -         | -       | -      |
| <b>Cytb (95%ID)</b>          | <i>Fish</i>       | 7 (+1) | 15 (+1) | 58 (+7)  | 70 (+32)  | 1149768 | 94.35  |
|                              | <i>Amphibians</i> | 1      | 2       | 2        | 2         | 1703    | 0.14   |
|                              | <i>Mammals</i>    | 3 (+1) | 4       | 5 (+1)   | 4 (+4)    | 65361   | 5.36   |
|                              | <i>Birds</i>      | 2      | 3       | 3        | 3         | 864     | 0.07   |
|                              | <i>Reptiles</i>   | 1      | 2       | 2        | 2         | 951     | 0.08   |
| <b>12S and Cytb combined</b> | <i>Fish</i>       | 10     | 25 (+2) | 91 (+14) | 124 (+53) | 7804764 | 95.48  |
|                              | <i>Amphibians</i> | 1      | 6       | 9        | 4 (+5)    | 57842   | 0.71   |
|                              | <i>Mammals</i>    | 4 (+1) | 14 (+1) | 21 (+5)  | 17 (+14)  | 286480  | 3.50   |
|                              | <i>Birds</i>      | 4      | 7       | 8 (+2)   | 8 (+2)    | 24424   | 0.30   |
|                              | <i>Reptiles</i>   | 1      | 2       | 2        | 2         | 951     | 0.01   |

Only reads where %Blast ID was higher than 97% for 12S and 95% for *cytb* were considered. The number of groups observed at different taxonomic levels is given when the determination was clear. The numbers in parentheses give the potential supplementary groups for which no clear assignment was available. Only species for which at least 5 reads were obtained are considered. The number of reads and their percentage are also given.
